# Supplementary material for: Liposomal Encapsulation for Systemic Delivery of Propranolol via Transdermal Iontophoresis Improves Bone Microarchitecture in Ovariectomized Rats
Source: MDPI journal article supplement (doi:10.3390/ijms18040822), 2017-04-13
Supplement: s1 [file s1]

# Supplementary Materials: Liposomal Encapsulation for Systemic Delivery of Propranolol via Transdermal Iontophoresis Improves Bone Microarchitecture in Ovariectomized Rats

Benjamin Teong, Shyh Ming Kuo, Wei-Hsin Tsai, Mei-Ling Ho, Chung-Hwan Chen, Han Hsiang Huang

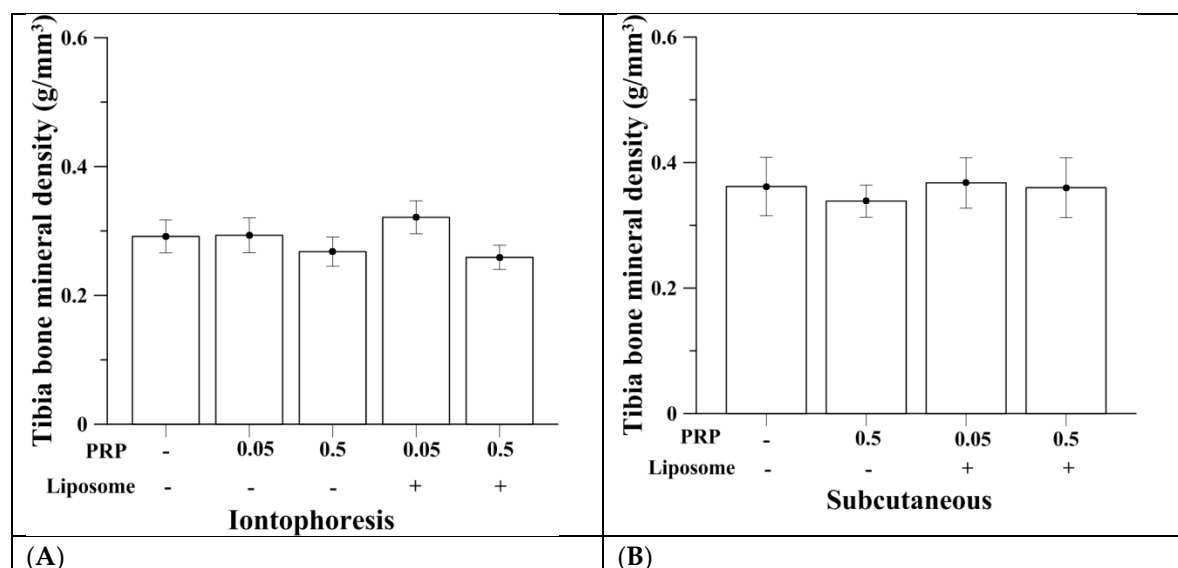

**Figure S1.** (A) Low-dose liposomal propranolol (PRP) (0.05 mg/kg) administered by iontophoresis ( $n = 13$ ) slightly and insignificantly increased bone mineral density (BMD) in tibia; (B) Subcutaneous injection ( $n = 8$ ) of pure or liposomal PRP did not show significant effects on tibia BMD.

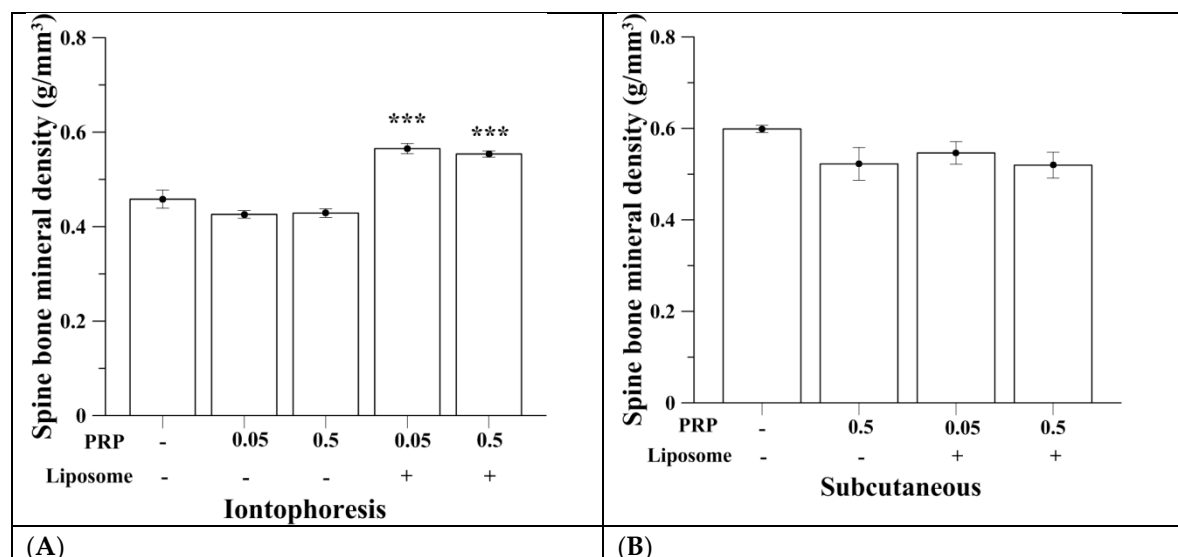

**Figure S2.** (A) Low-dose (0.05 mg/kg) and high-dose (0.5 mg/kg) liposomal PRP given by iontophoresis ( $n = 13$ ) enhanced BMD in spine ( $p < 0.001$ ); (B) Subcutaneous injection PRP of pure or liposomal forms ( $n = 8$ ) did not have significant effects on spinal BMD.
